# Supplementary material
Source: PubMed Central journal article supplement (PMC8241961)

## **SUPPLEMENTARY INFORMATION**

### **Title of paper**

Neonatal screening program for five conditions in Honduras

### **Authors' full names**

Michelle Melissa Miralda Buckley<sup>1</sup>, Lindsay Borjas Aguilar<sup>2</sup>, Rosibel Colindres Lainez<sup>3</sup>,  
Hector Joaquin Alvarado Valenzuela<sup>3</sup>, Fernando Ponce<sup>4</sup>, Débora Gusmão Melo<sup>1,5</sup>

### **Authors' primary affiliations**

1 - Postgraduate Nursing Program, Federal University of São Carlos (UFSCar), São Paulo, Brazil

2 - Immunology Laboratory, Clinical Laboratory Department, Hospital Escuela Universitario de la Universidad Nacional Autónoma de Honduras (UNAH), Tegucigalpa, Honduras

3 - Clinical Analysis Laboratory, Instituto Hondureño de Seguridad Social (IHSS), Tegucigalpa, Honduras

4 - Statistics Department, Instituto Hondureño de Seguridad Social (IHSS), Tegucigalpa, Honduras

5 - Department of Medicine, Federal University of São Carlos (UFSCar), São Paulo, Brazil

### **Correspondence to**

D.G. Melo

Rod. Washington Luís (SP-310), Km 235, Campus da UFSCar

Departamento de Medicina

São Carlos, SP, Brasil, CEP 13565-905

Phone/Fax: +55 16 3351-8340

[dgmelo@ufscar.br](mailto:dgmelo@ufscar.br)

# STANDARD OPERATING PROCEDURE FOR THE DETERMINATION OF TSH (CONGENITAL HYPOTHYROIDISM)

## PROCEDIMIENTO OPERATIVO ESTÁNDAR PARA LA DETERMINACIÓN DE TSH (HIPOTIROIDISMO CONGÉNITO)

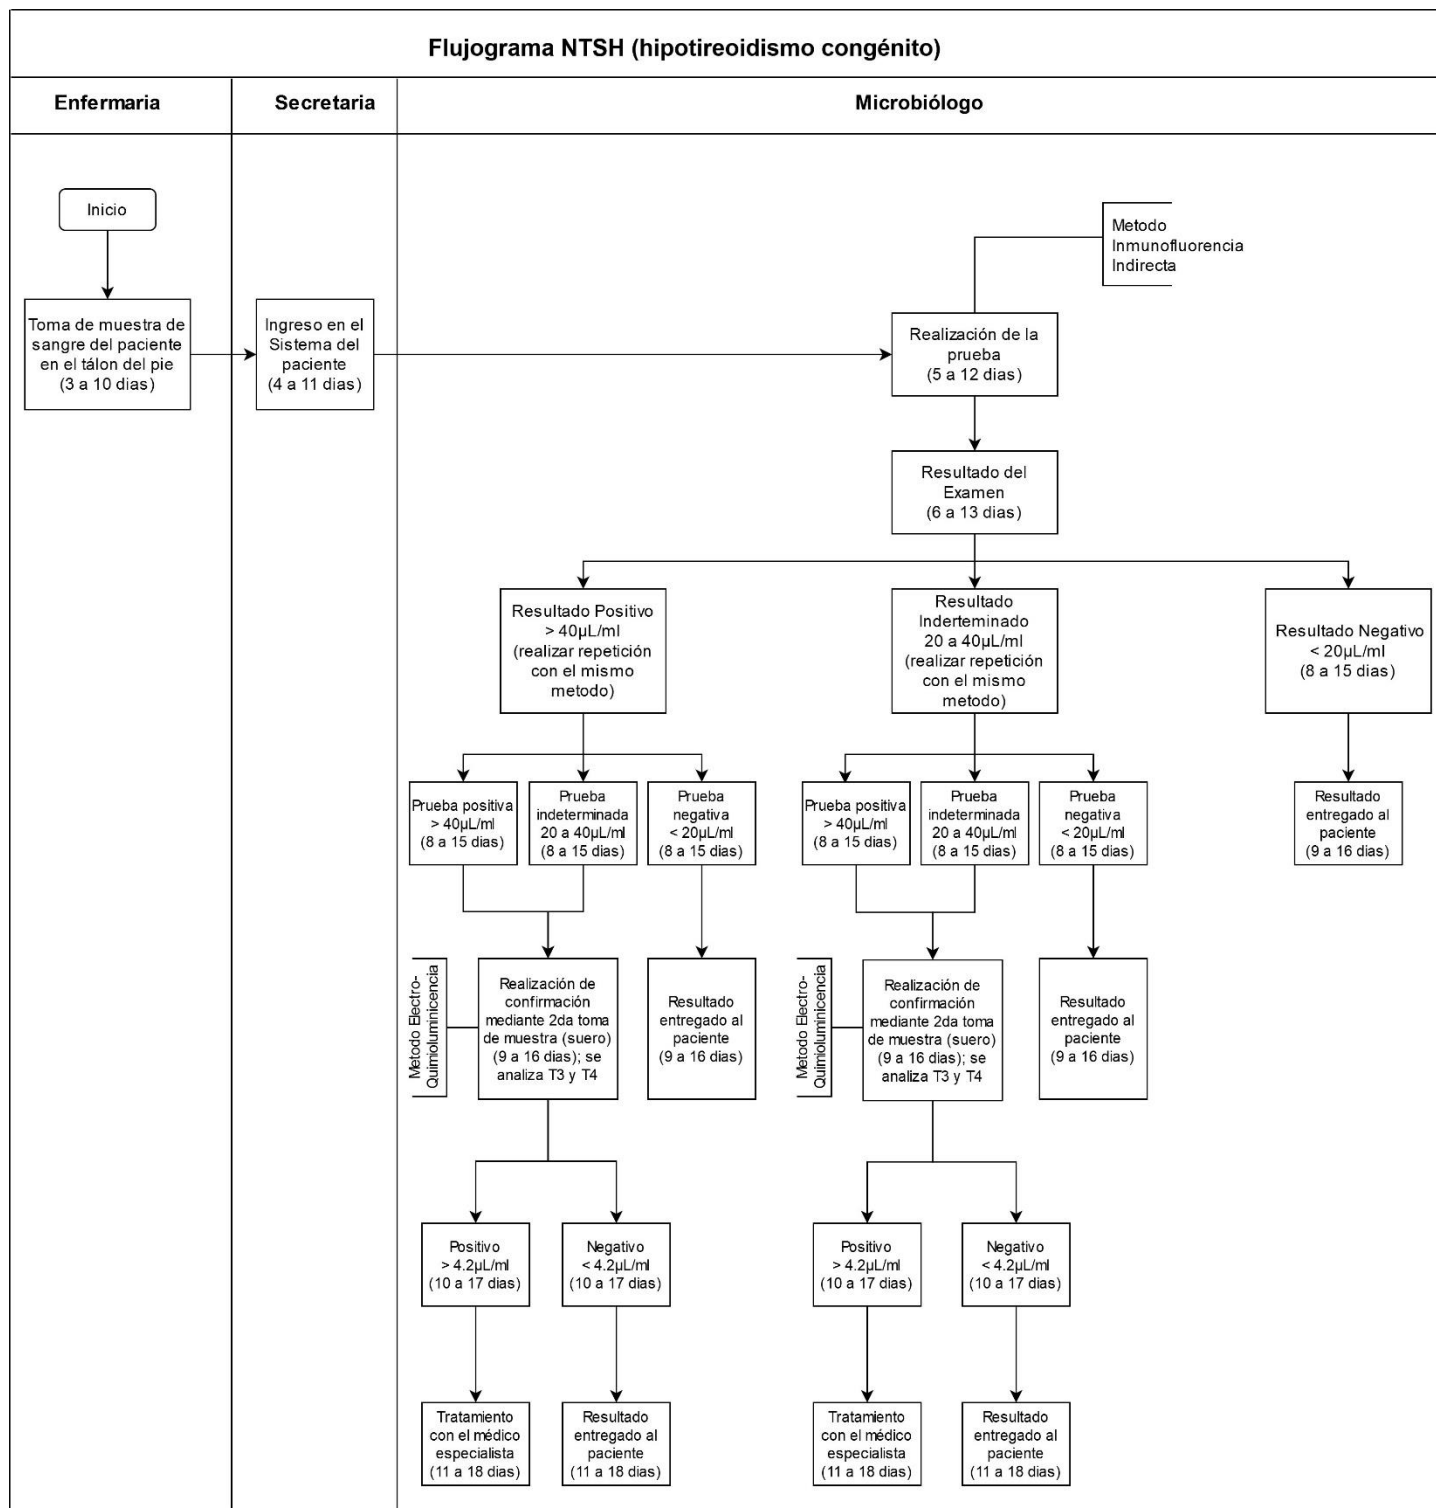

STANDARD OPERATING PROCEDURE FOR THE DETERMINATION OF IRT (CYSTIC FIBROSIS)

PROCEDIMIENTO OPERATIVO ESTÁNDAR PARA LA DETERMINACIÓN DE IRT (FIBROSIS QUÍSTICA)

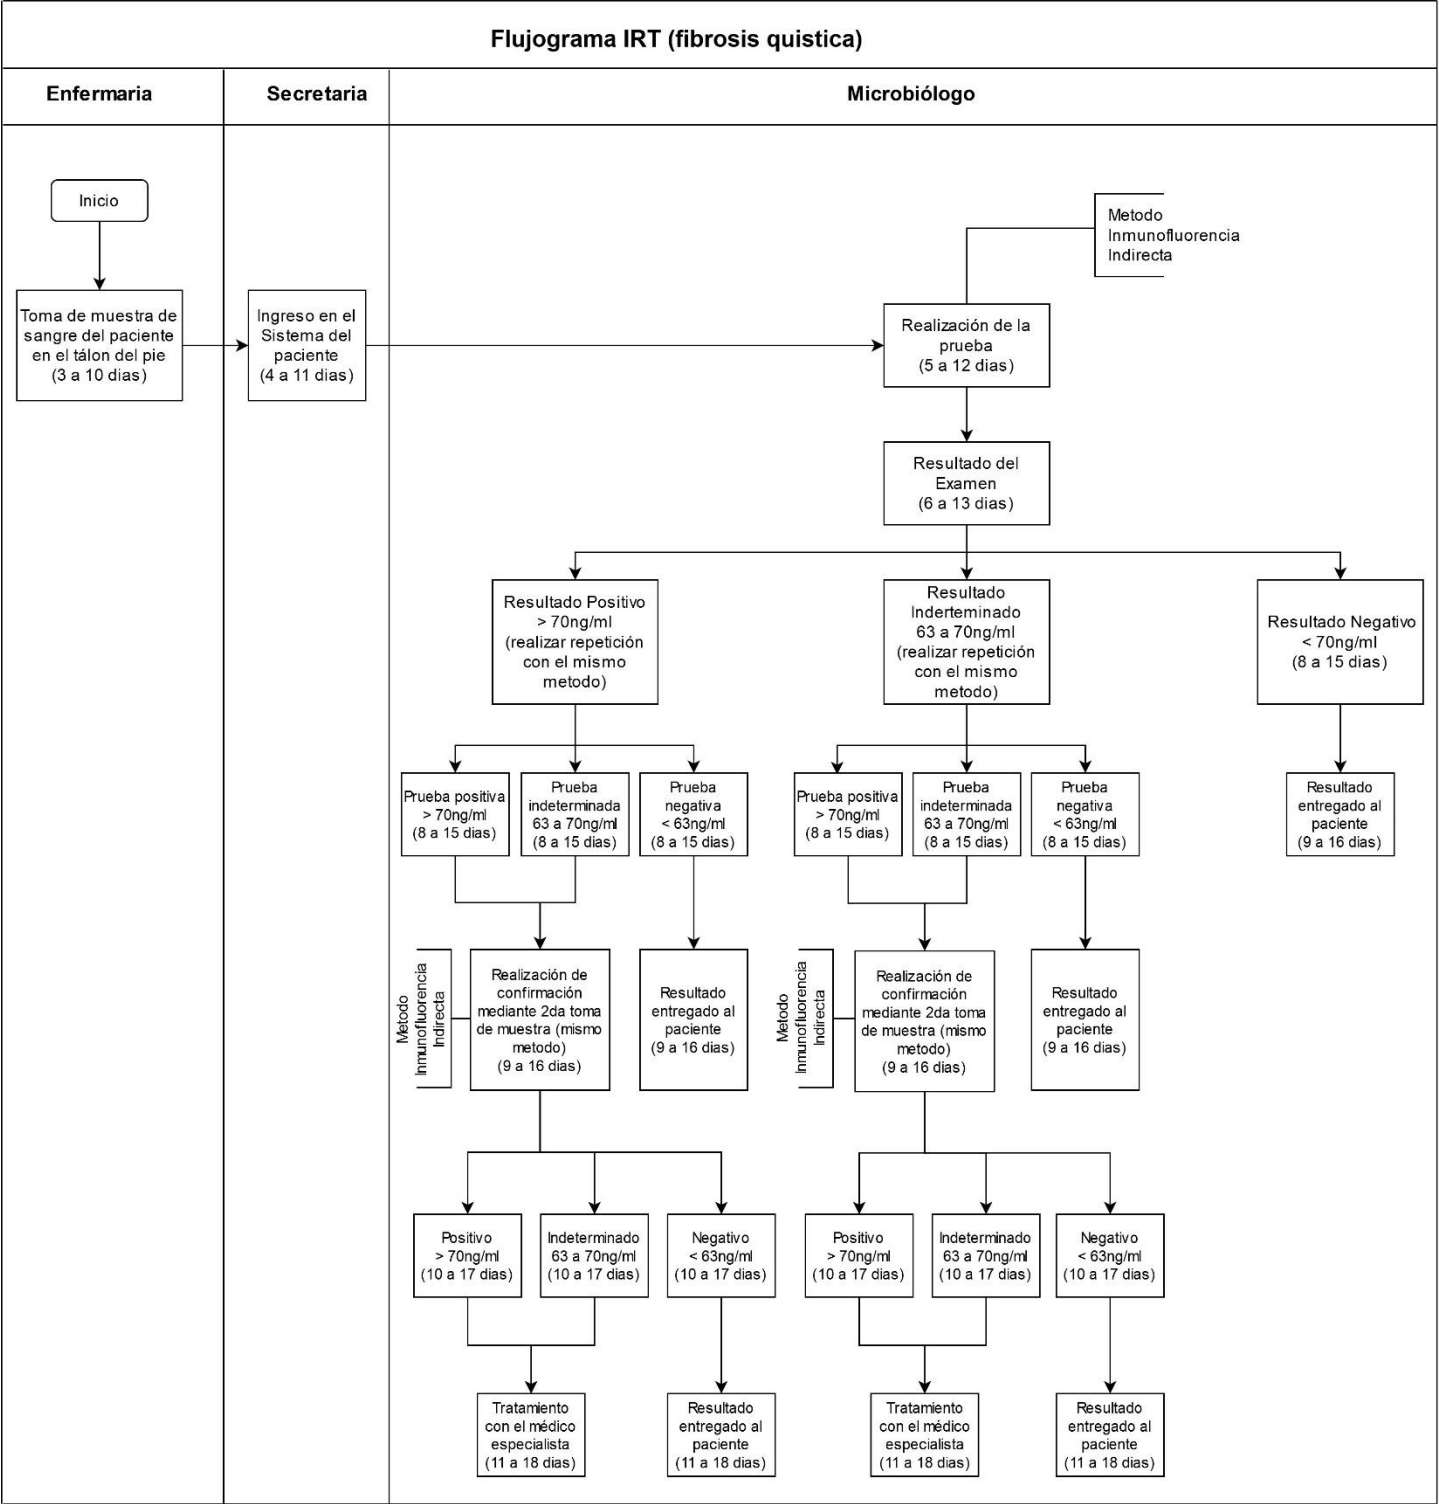

## PROGESTERONE (ADRENAL HYPERPLASIA)

## PROGESTERONA (HIPERPLASIA SUPRARRENAL)

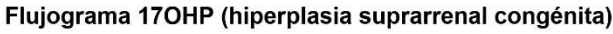

STANDARD OPERATING PROCEDURE FOR THE DETERMINATION OF TOTAL GALACTOSE  
(GALACTOSEMIA)

PROCEDIMIENTO OPERATIVO ESTÁNDAR PARA LA DETERMINACIÓN DE GALACTOSA  
TOTAL (GALACTOSEMIA)

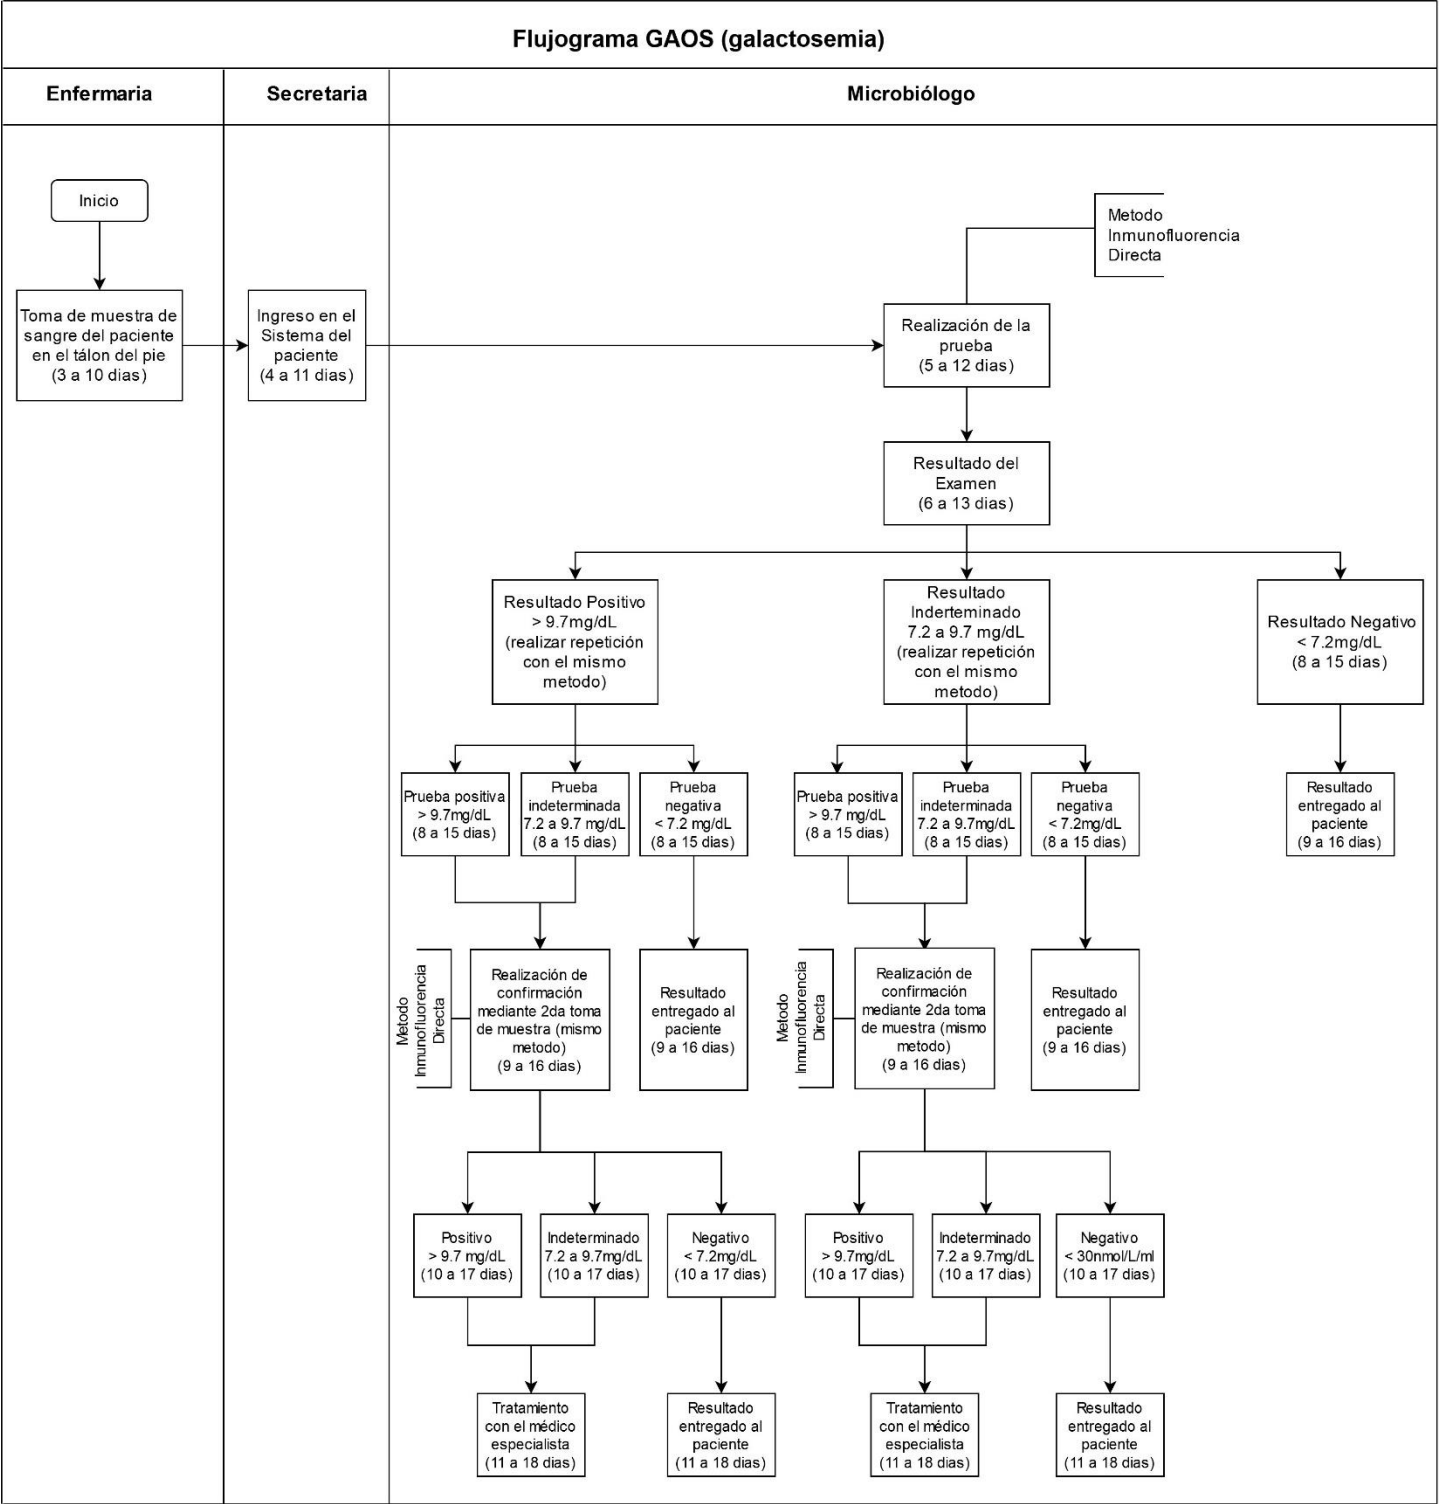

# STANDARD OPERATING PROCEDURE FOR THE DETERMINATION OF NEONATAL PHENYLANANINE (PHENYLKETONURIA)

## PROCEDIMIENTO OPERATIVO ESTÁNDAR PARA LA DETERMINACIÓN DE FENILANANINA NEONATAL (FENILCETONURIA)

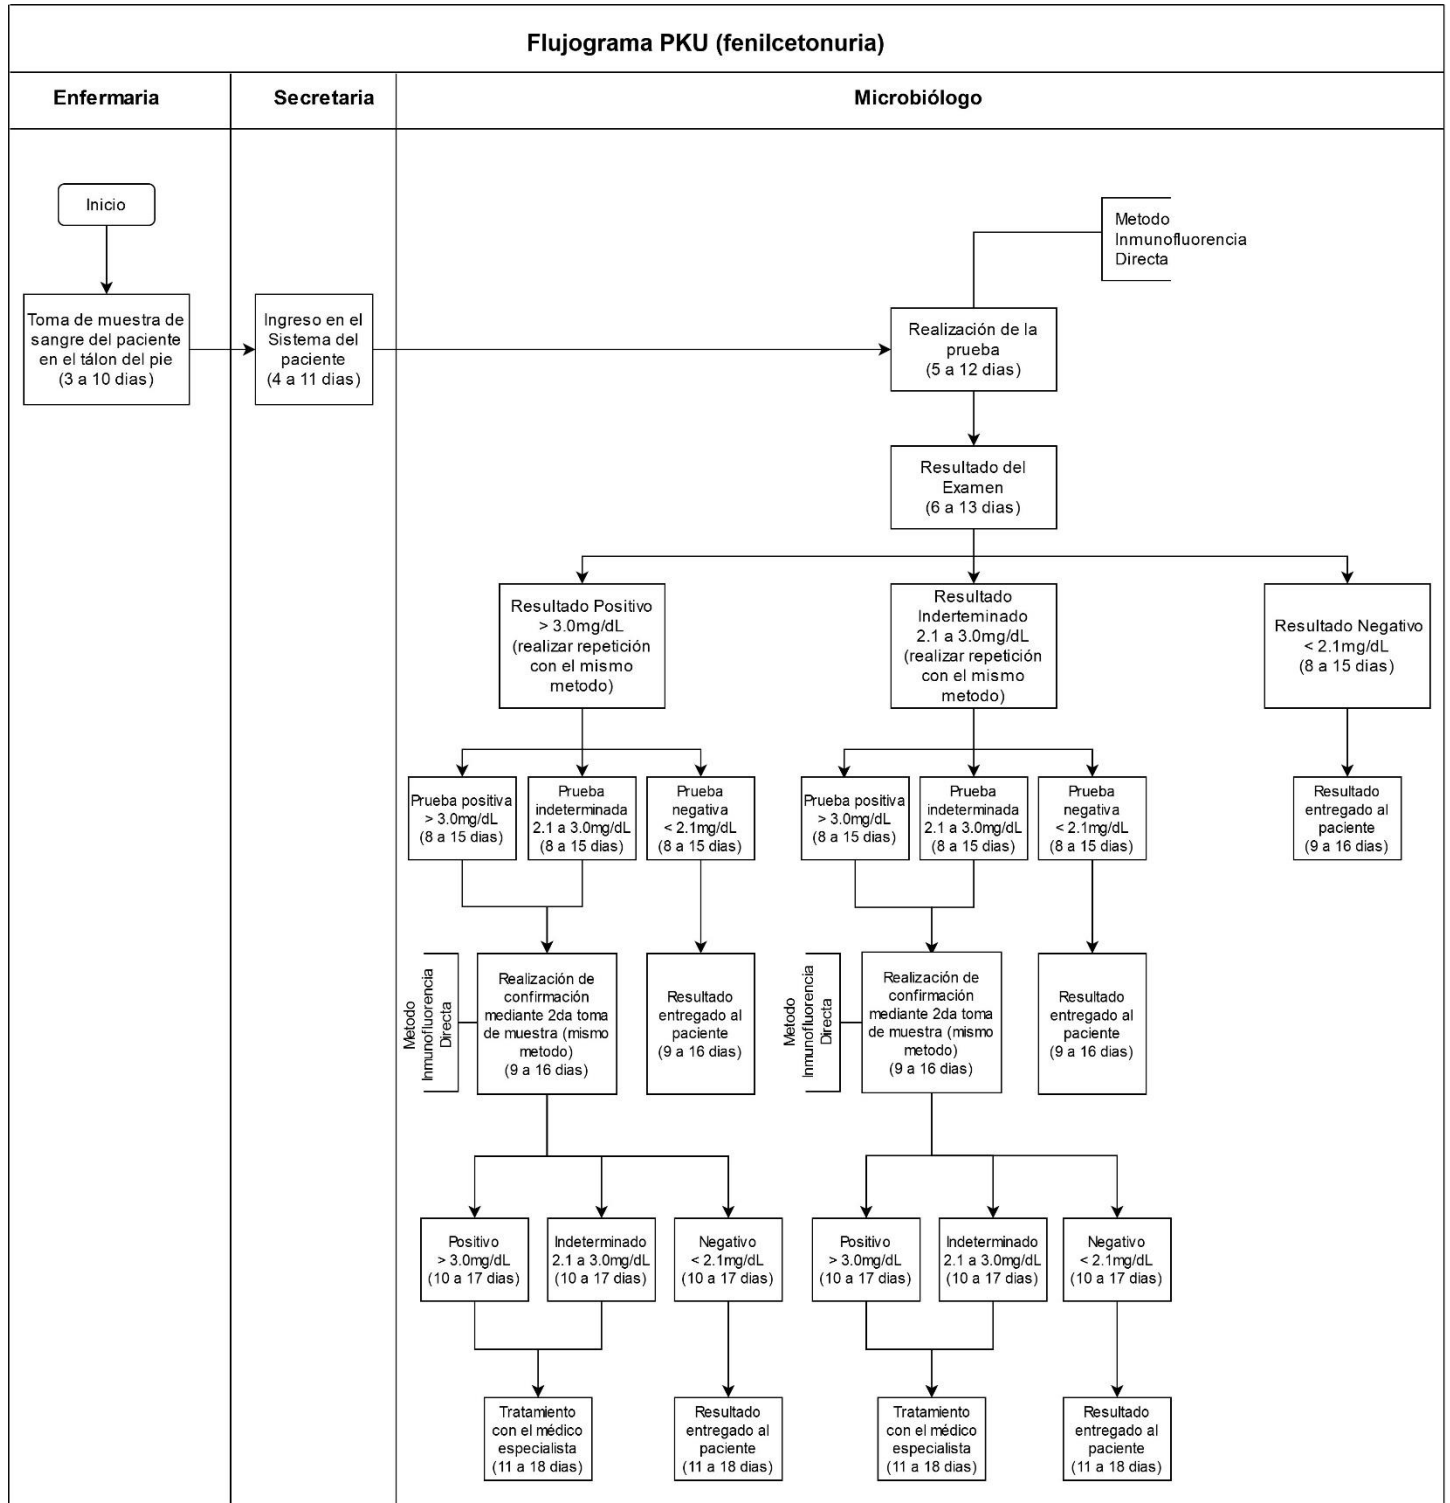

Supplement: 12687_2021_506_MOESM1_ESM.pdf [file 12687_2021_506_MOESM1_ESM.pdf]
